# Supplementary material for: Synergistic Effects of Sleep-Depression Comorbidity on Cardiovascular Health: A Gender- and Age-Stratified Analysis Based on NHANES Data
Source: Research Square preprint supplement (doi:10.21203/rs.3.rs-7350961/v1), 2025-11-28
Supplement: Supplementary file 1 [file 0f2d3d21adf06e02e3ad5a93.docx]

**Table 1: frequency and proportion of Main Variables**

| variable | category | frequency | proportion |
| --- | --- | --- | --- |
| RIAGENDR | Male | 12759 | 0.539 |
| Female | 10795 | 0.461 |
| DMDEDUC2 | Less than 9th grade | 1381 | 0.038 |
| 9-11th grade | 2254 | 0.072 |
| High school graduate | 5420 | 0.226 |
| Some college or AA degree | 7875 | 0.329 |
| College graduate or above | 6624 | 0.335 |
| SDMVPSU | 1 | 11993 | 0.509 |
| 2 | 11561 | 0.491 |
| SDMVSTRA | 134 | 1315 | 0.063 |
| 135 | 1694 | 0.079 |
| 136 | 1783 | 0.076 |
| 137 | 1393 | 0.059 |
| 138 | 1587 | 0.066 |
| 139 | 1626 | 0.069 |
| 140 | 1563 | 0.064 |
| 141 | 1723 | 0.080 |
| 142 | 1907 | 0.089 |
| 143 | 1393 | 0.066 |
| 144 | 1776 | 0.068 |
| 145 | 1542 | 0.062 |
| 146 | 1480 | 0.064 |
| 147 | 1510 | 0.056 |
| 148 | 1262 | 0.040 |
| HIQ011 | Yes | 21634 | 0.917 |
| No | 1920 | 0.083 |
| SLQ040 | Never | 17654 | 0.740 |
| Rarely - 1-2 nights a week | 2883 | 0.127 |
| Occasionally - 3-4 nights a week | 1630 | 0.071 |
| Frequently - 5 or more nights a week | 1387 | 0.063 |
| SLQ050 | Yes | 6060 | 0.293 |
| No | 17494 | 0.707 |
| SLQ120 | Never | 3380 | 0.127 |
| Rarely - 1 time a month | 5289 | 0.223 |
| Sometimes - 2-4 times a month | 8034 | 0.338 |
| Often- 5-15 times a month | 4494 | 0.208 |
| always - 16-30 times a month | 2357 | 0.104 |
