# Supplementary material for: Synergistic Effects of Sleep-Depression Comorbidity on Cardiovascular Health: A Gender- and Age-Stratified Analysis Based on NHANES Data
Source: Research Square preprint supplement (doi:10.21203/rs.3.rs-7350961/v1), 2025-11-28
Supplement: Supplementary file 2 [file 3cf907807805505034faf8d7.docx]

**Table 3: Comparison of Main Variables**

| Variable beta | lci uci | Se P1 | P2 |
| --- | --- | --- | --- |

|  |  |  |  |  |  |  |
| --- | --- | --- | --- | --- | --- | --- |
| HIQ011:RIAGENDR | 2.086e-01 | -3.36E+00 | 3.77E+00 | 1.39E+00 | 0.88624 | 3.45E-05 |
| HIQ011:RIDAGEYR | -1.51E-02 | -6.86E-02 | 3.85E-02 | 2.08E-02 | 0.50252 | 5.96E-42 |
| HIQ011:DMDEDUC2 | -3.09E-01 | -1.59E+00 | 9.75E-01 | 5.00E-01 | 0.56356 | 2.09E-47 |
| HIQ011:INDFMMPI | -1.17E+00 | -2.21E+00 | -1.24E-01 | 4.07E-01 | 0.03479 | 0.00E+00 |
| HIQ011:WTMEC2YR | -1.76E-05 | -4.98E-05 | 1.47E-05 | 1.25E-05 | 0.22016 | 0.00E+00 |
| HIQ011:SLQ040 | -1.01E+00 | -2.66E+00 | 6.31E-01 | 6.40E-01 | 0.17404 | 9.46e-314 |
| HIQ011:SLQ050 | 1.01E+00 | -2.04E+00 | 4.07E+00 | 1.19E+00 | 0.43261 | 1.33E-65 |
| HIQ011:SLQ120 | -4.63E-01 | -1.60E+00 | 6.77E-01 | 4.44E-01 | 0.34426 | 7.73E-116 |

|  |
| --- |
