# Supplementary material for: Synergistic Effects of Sleep-Depression Comorbidity on Cardiovascular Health: A Gender- and Age-Stratified Analysis Based on NHANES Data
Source: Research Square preprint supplement (doi:10.21203/rs.3.rs-7350961/v1), 2025-11-28
Supplement: Supplementary file 3 [file c77ebdb4b3e5af5ad28025de.docx]

**Table 2: Comparison of Main Variables**

| Variable | Mean | SE |  |
| --- | --- | --- | --- |

DBD895 22.283 4.1027

DBD900 2.2602 0.2153

RIDAGEYR 36.797 0.3702

WTMEC2YR 84832 2569.5

INDFMMPI 2.5592 0.0289

BMXBMI 26.845 0.0763

BMXWAIST 90.361 0.2422

BPXOSY1 119.26 0.185

BPXODI1 71.214 0.1151

BPXOSY2 118.75 0.1715

BPXODI2 70.993 0.0867

BPXOSY3 118.95 0.1759

BPXODI3 69.783 0.0873

LBDHDD 57.266 0.256

LBXHSCRP 3.1624 0.1168

LBXTC 177.93 0.4435

LBXTR 172.88 1.6066

LBDLDL 86.76 0.4027

SLD012 7.5284 0.017

SLD013 8.2952 0.04

|  |
| --- |
